# Supplementary material for: Genomic Analyses of Wild and Cultivated Bacanora Agave (Agave angustifolia var. pacifica) Reveal Inbreeding, Few Signs of Cultivation History and Shallow Population Structure
Source: MDPI journal article supplement (doi:10.3390/plants11111426), 2022-05-27
Supplement: s1 [file s1]

## Plants

Supplementary Information for

### **Genomic analyses of wild and cultivated bacanora agave (*Agave angustifolia* var. *pacifica*) reveal inbreeding, few signs of cultivation history and shallow population structure**

Anastasia Klimova, Karen Y. Ruiz Mondragón, Francisco Molina Frenan, Erika Aguirre-Planter and Luis E. Eguiarte

\* Corresponding authors: Luis E. Eguiarte, [fruns@unam.mx](mailto:fruns@unam.mx); Anastasia Klimova, [anastasia\\_aleksandrovna@hotmail.com](mailto:anastasia_aleksandrovna@hotmail.com)

This PDF file includes:

Tables S1 to S5

Figures S1 to S10

DNA extraction protocol

## Supplementary material tables.

**Table S1.** Sites where individuals of *Agave angustifolia* var. *pacifica* from the state of Sonora were collected, including information on geographical region, site abbreviation, coordinates, number of individuals used for genomic analyses (*N*) and sample source (wild, cultivated, backyard plantation). Note: values of *N* do not include one individual removed during the genomic filtering step. All samples were collected in 2021.

| Id | Region     | Site name | Latitude     | Longitude     | Source     | N | Elevation,<br>m |
|----|------------|-----------|--------------|---------------|------------|---|-----------------|
| 1  | Bacanora   | NovW1     | 28°57'37.1"N | 109°35'28.8"W | Wild       | 3 | 576             |
| 2  | Bacanora   | NovW2     | 28°56'51.5"N | 109°30'21.1"W | Wild       | 3 | 899             |
| 3  | Bacanora   | NovC1     | 28°59'43.2"N | 109°23'35.8"W | Cultivated | 3 | 503             |
| 4  | Bacanora   | NovC2     | 28°58'42.5"N | 109°24'02.4"W | Backyard   | 3 | 458             |
| 5  | Bacanora   | NovC3     | 28°56'59.9"N | 109°30'53.9"W | Cultivated | 3 | 931             |
| 6  | Bacanora   | NovW3     | 28°56'46.5"N | 109°40'10.7"W | Wild       | 3 | 669             |
| 7  | Mazatan    | MazC1     | 29°12'38.4"N | 110°07'20.2"W | Cultivated | 3 | 600             |
| 8  | Mazatan    | MazW1     | 29°11'04.9"N | 110°09'00.3"W | Wild       | 3 | 642             |
| 9  | Mazatan    | MazW2     | 29°10'03.5"N | 110°09'17.0"W | Wild       | 3 | 749             |
| 10 | Mazatan    | MazC2     | 29°12'22.8"N | 110°08'34.9"W | Backyard   | 3 | 591             |
| 11 | San Carlos | SCarW1    | 28°18'12.1"N | 111°24'02.4"W | Wild       | 3 | 34              |
| 12 | San Carlos | SCarW2    | 27°58'37.4"N | 111°07'49.2"W | Wild       | 3 | 7               |
| 13 | San Carlos | SCarW3    | 27°56'24.3"N | 111°05'51.4"W | Wild       | 3 | 66              |
| 14 | Hermosillo | HermC1    | 29°00'49.7"N | 110°57'10.6"W | Cultivated | 3 | 276             |
| 15 | Hermosillo | HermC2    | 29°01'20.9"N | 110°57'00.2"W | Cultivated | 3 | 249             |
| 16 | Moctezuma  | MocC1     | 29°27'34.5"N | 110°16'40.8"W | Cultivated | 3 | 422             |
| 17 | Moctezuma  | MocW1     | 29°29'32.5"N | 110°11'55.8"W | Wild       | 3 | 473             |
| 18 | Moctezuma  | MocW2     | 29°46'15.4"N | 109°43'24.7"W | Wild       | 3 | 807             |
| 19 | Moctezuma  | MocW3     | 29°48'12.8"N | 109°38'20.7"W | Wild       | 3 | 674             |
| 20 | Moctezuma  | MocC2     | 29°41'08.3"N | 109°38'05.9"W | Cultivated | 3 | 615             |
| 21 | Moctezuma  | MocC3     | 29°27'34.5"N | 110°16'40.8"W | Cultivated | 3 | 422             |
| 22 | Navojoa    | NavW1     | 26°44'11.7"N | 109°34'09.5"W | Wild       | 3 | 4               |
| 23 | Navojoa    | NavW2     | 26°46'06.0"N | 109°28'47.2"W | Wild       | 3 | 8               |
| 24 | Navojoa    | NavW3     | 26°49'11.1"N | 109°17'18.5"W | Wild       | 3 | 56              |
| 25 | Navojoa    | NavC1     | 27°04'29.9"N | 109°20'41.4"W | Cultivated | 3 | 80              |
| 26 | Navojoa    | NavC2     | 27°05'28.7"N | 109°06'18.9"W | Cultivated | 3 | 274             |
| 27 | Navojoa    | NavC3     | 27°05'28.7"N | 109°06'18.9"W | Cultivated | 3 | 274             |
| 28 | Navojoa    | NavC4     | 27°02'33.4"N | 108°58'50.8"W | Cultivated | 3 | 440             |

|    |                                              |       |              |               |      |   |     |
|----|----------------------------------------------|-------|--------------|---------------|------|---|-----|
| 29 | Cam<br>(Carretera<br>Hermosillo-<br>Guaymas) | CamW  | 28°28'38.4"N | 111°02'43.7"W | Wild | 3 | 208 |
| 30 | Yecora                                       | YecW1 | 28°49'14.2"N | 110°33'13.7"W | Wild | 2 | 447 |
| 31 | Yecora                                       | YecW2 | 28°34'03.7"N | 109°41'37.6"W | Wild | 2 | 608 |
| 32 | Yecora                                       | YecW3 | 28°34'21.3"N | 109°33'09.1"W | Wild | 1 | 188 |
| 33 | Yecora                                       | YecW4 | 28°29'17.0"N | 109°22'09.7"W | Wild | 2 | 858 |
| 34 | Yecora                                       | YecW5 | 28°25'57.6"N | 109°14'54.1"W | Wild | 2 | 645 |

**Table S2.** Quality information for the filtered SNPs used in the present study. The data shown is for 95 individuals of *Agave angustifolia* var. *pacifica* from the state of Sonora, Mexico, and 11,619 SNPs.

| Quality statistic      | Mean (SD)     |
|------------------------|---------------|
| Individual depth       | 48.6 (6.5)    |
| Individual missingness | 0.028 (0.01)  |
| Site missingness       | 0.028 (0.029) |

**Table S3.** Descriptive genomic diversity estimates and corresponding confidence intervals in parentheses as determined for each management type. N—number of samples; MLH—multilocus heterozygosity; sMLH—standardized multilocus heterozygosity;  $F_{IS}$ —Wright's inbreeding index; Fhat3—inbreeding index; IR—internal relatedness.

| Management | N  | MLH          | sMLH         | $F_{IS}$     | Fhat3        | IR           |
|------------|----|--------------|--------------|--------------|--------------|--------------|
| Wild       | 53 | 0.22 (0.002) | 0.99 (0.013) | 0.13 (0.012) | 0.13 (0.012) | 0.05 (0.010) |
| Cultivated | 42 | 0.22 (0.003) | 1.00 (0.009) | 0.13 (0.007) | 0.13 (0.007) | 0.05 (0.006) |

**Table S4.** Descriptive genomic diversity statistics and corresponding confidence intervals in parentheses for *Agave angustifolia* var. *pacifica* from the state of Sonora, Mexico based on population and management type. N—number of samples; MLH—multilocus heterozygosity;  $F_{IS}$ —Wright's inbreeding index; Fhat3—inbreeding index; IR—internal relatedness. Region/population column is coded according to Table S1.

| Region/Population                               | N  | Management | MLH          | $F_{IS}$     | Fhat3        | IR           |
|-------------------------------------------------|----|------------|--------------|--------------|--------------|--------------|
| Novillo                                         | 9  | Wild       | 0.22 (0.015) | 0.15 (0.058) | 0.15 (0.066) | 0.07 (0.052) |
| Mazatan                                         | 6  | Wild       | 0.23 (0.011) | 0.09 (0.045) | 0.11 (0.041) | 0.04 (0.037) |
| San Carlos                                      | 9  | Wild       | 0.22 (0.002) | 0.14 (0.009) | 0.13 (0.010) | 0.06 (0.010) |
| Moctezuma                                       | 8  | Wild       | 0.22 (0.002) | 0.13 (0.009) | 0.13 (0.012) | 0.05 (0.009) |
| Navojoa                                         | 9  | Wild       | 0.22 (0.008) | 0.13 (0.319) | 0.11 (0.027) | 0.04 (0.029) |
| Camino (Cam), (Carretera<br>Hermosillo-Guaymas) | 3  | Wild       | 0.22 (0.015) | 0.15 (0.058) | 0.15 (0.033) | 0.08 (0.051) |
| Yecora                                          | 9  | Wild       | 0.22 (0.006) | 0.14 (0.025) | 0.13 (0.021) | 0.05 (0.023) |
| Hermosillo                                      | 6  | Cultivated | 0.22 (0.010) | 0.15 (0.040) | 0.15 (0.046) | 0.06 (0.036) |
| Mazatan                                         | 6  | Cultivated | 0.22 (0.008) | 0.12 (0.032) | 0.12 (0.016) | 0.04 (0.016) |
| Moctezuma                                       | 9  | Cultivated | 0.22 (0.004) | 0.12 (0.016) | 0.13 (0.011) | 0.05 (0.010) |
| Navojoa                                         | 12 | Cultivated | 0.22 (0.003) | 0.13 (0.012) | 0.13 (0.014) | 0.06 (0.008) |
| Novillo                                         | 9  | Cultivated | 0.22 (0.003) | 0.12 (0.013) | 0.12 (0.014) | 0.04 (0.010) |

**Table S5.** Number of loci and raw SNPs recovered for the datasets under different ipyrad clustering parameters.

| Samples   | Clustering parameter | Loci    | SNPs    |
|-----------|----------------------|---------|---------|
| All sites | 0.85                 | 86,014  | 610,119 |
|           | 0.9                  | 94, 174 | 638,704 |
|           | 0.95                 | 111,390 | 598,158 |

## Supplementary material figures.

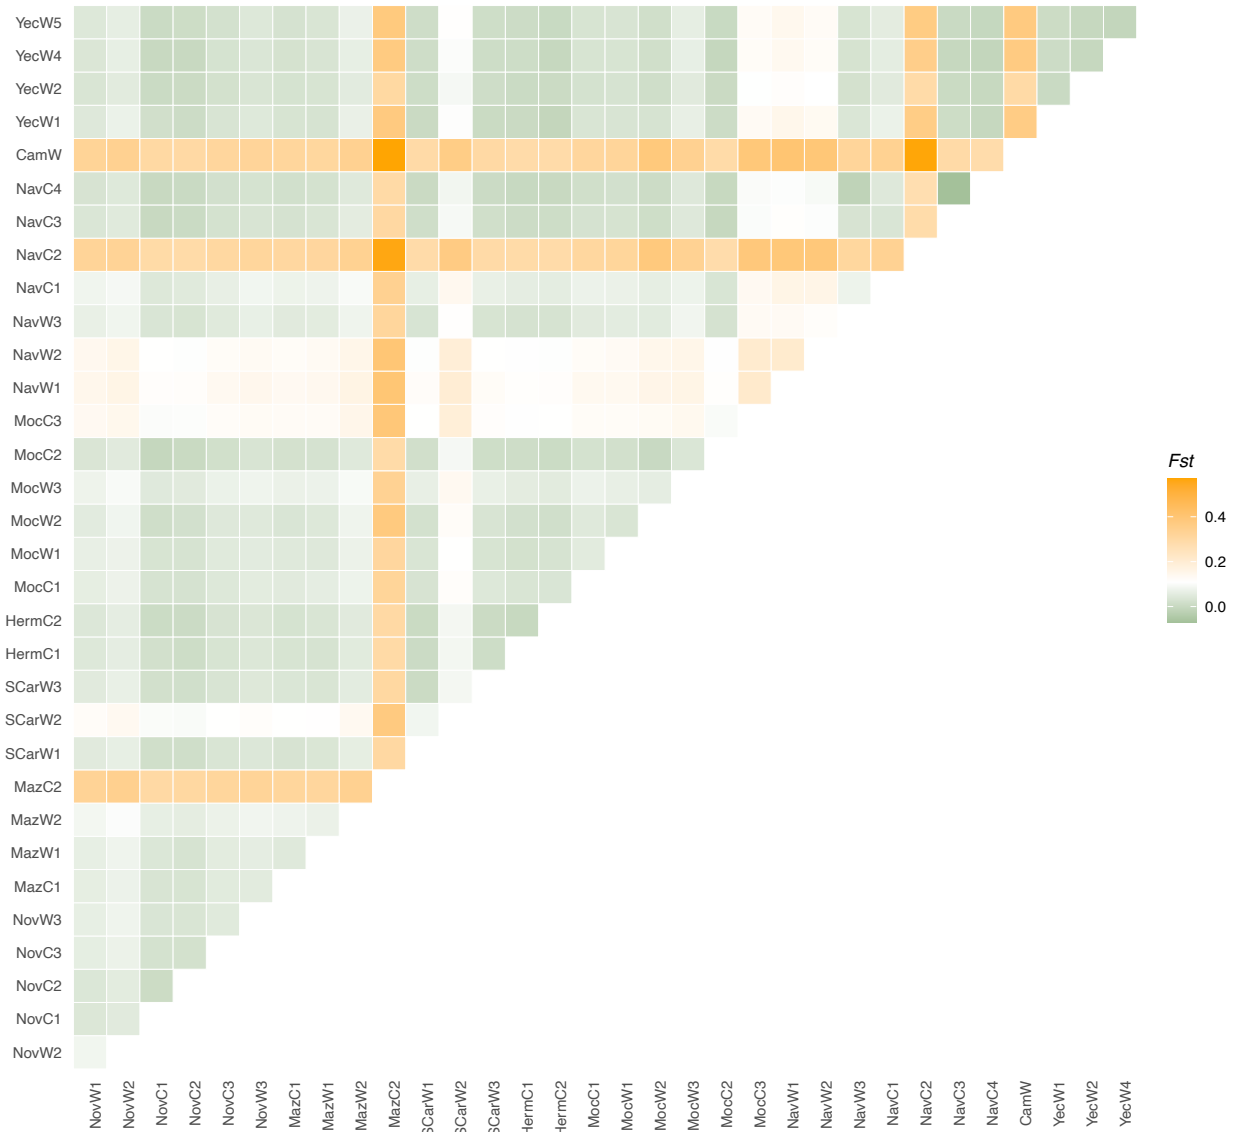

**Figure S1.** Pairwise  $F_{ST}$  differences among all the sampling sites of wild and cultivated *Agave angustifolia* var. *pacifica* from the state of Sonora, Mexico. Colors represent  $F_{ST}$  values from the lowest of  $-0.07$  in green to the highest of  $0.57$  in orange. Sampling sites are coded according to Table S1.

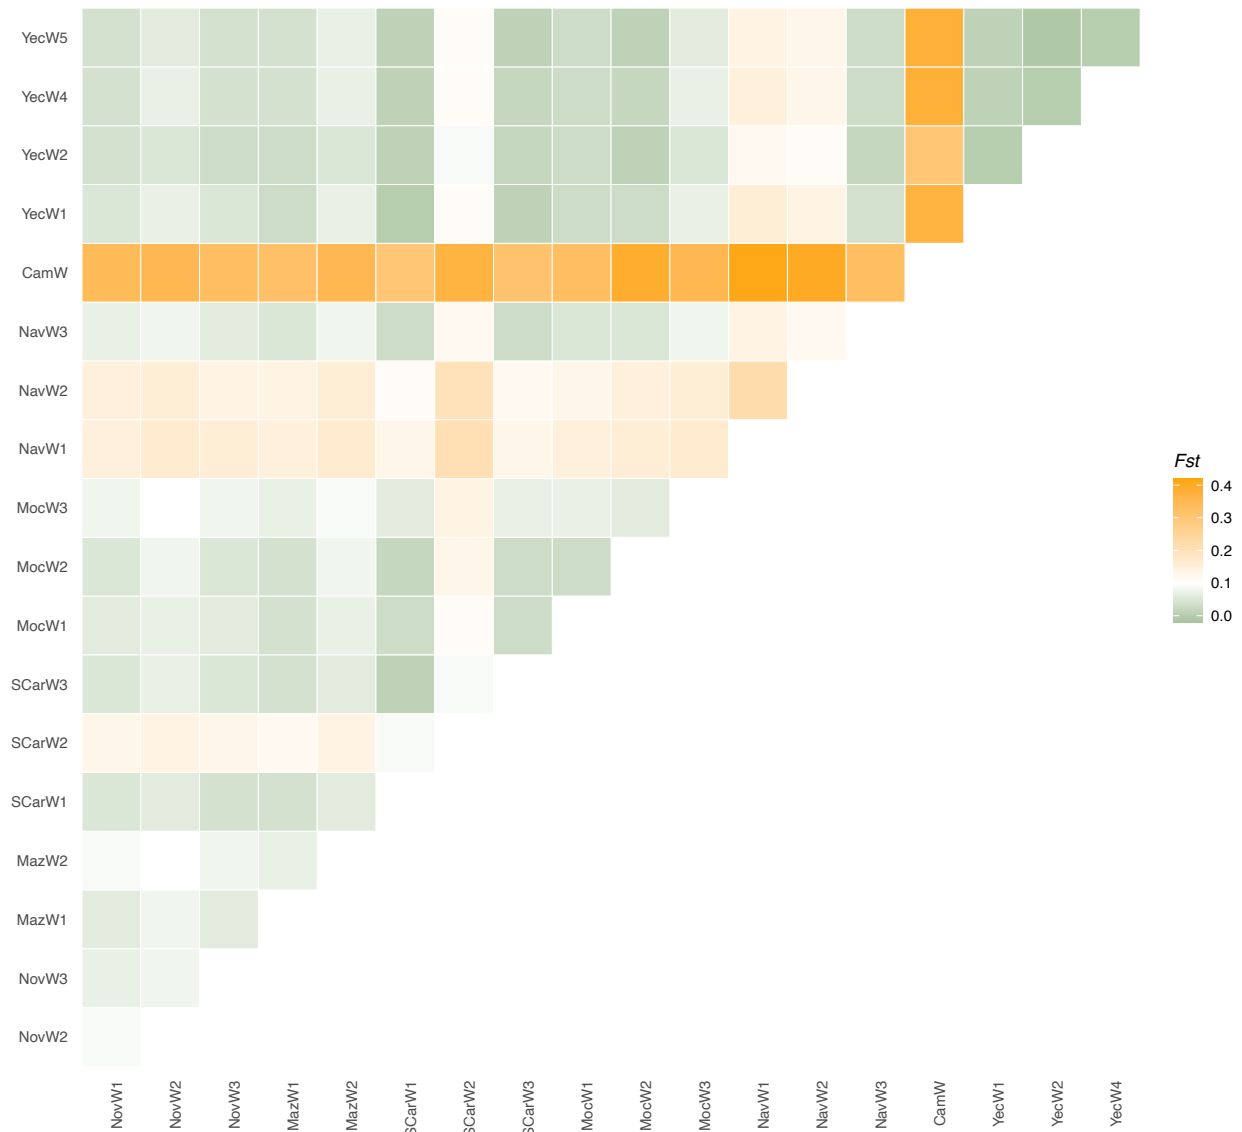

**Figure S2.** Pairwise  $F_{ST}$  differences among all the sampling sites of wild *Agave angustifolia* var. *pacifica* from the state of Sonora, Mexico. Colors represent  $F_{ST}$  values from the lowest of  $-0.01$  in green to the highest of  $0.41$  in orange. Sampling sites are coded according to Table S1.

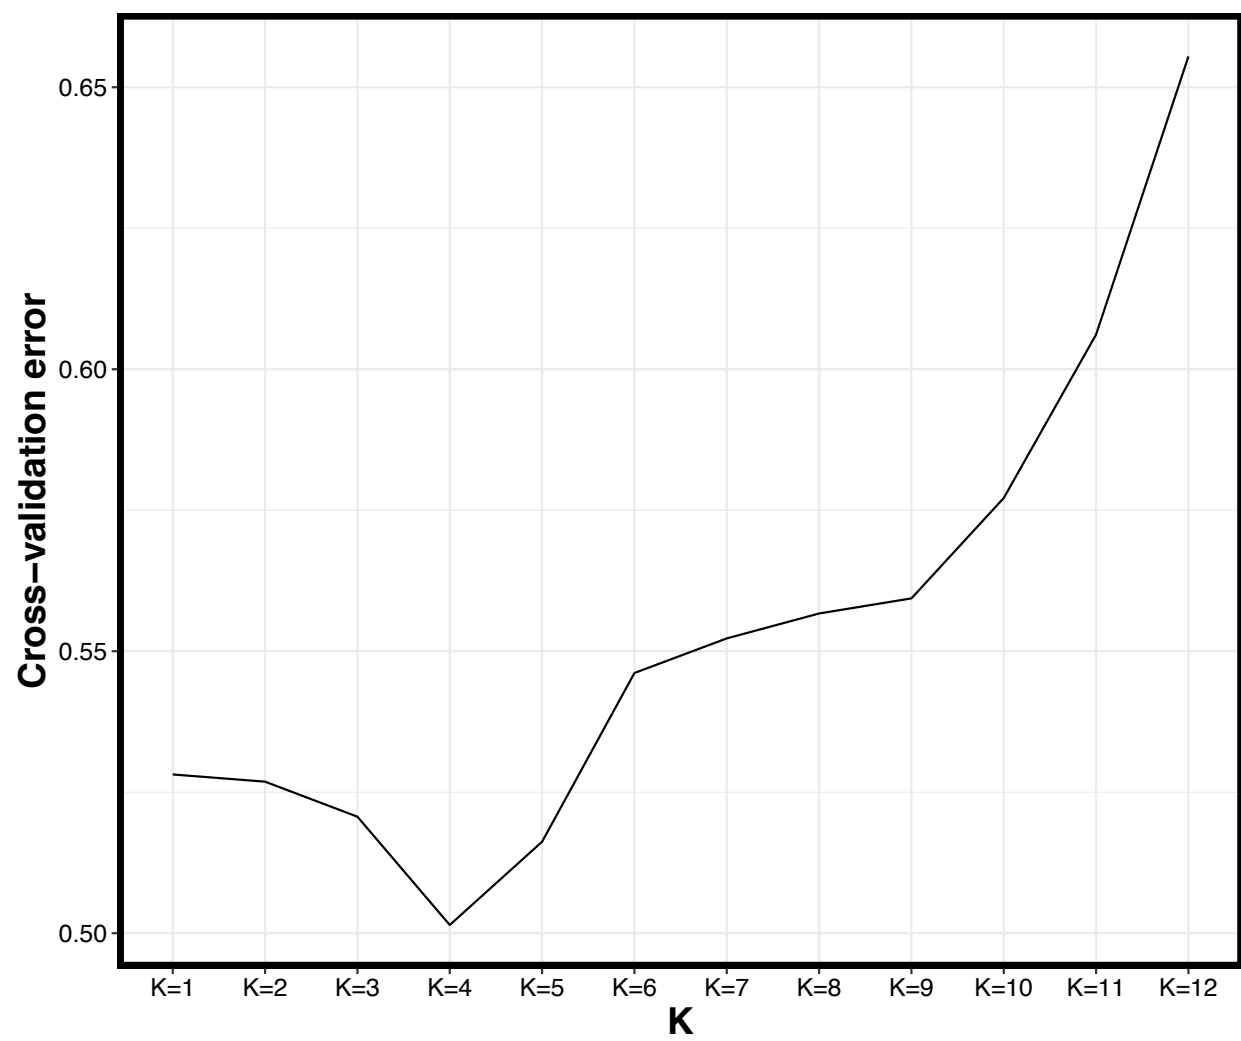

**Figure S3.** Plot of ADMIXTURE cross validation error from  $K = 1$  through  $K = 12$ , as based on all samples (cultivated and wild).

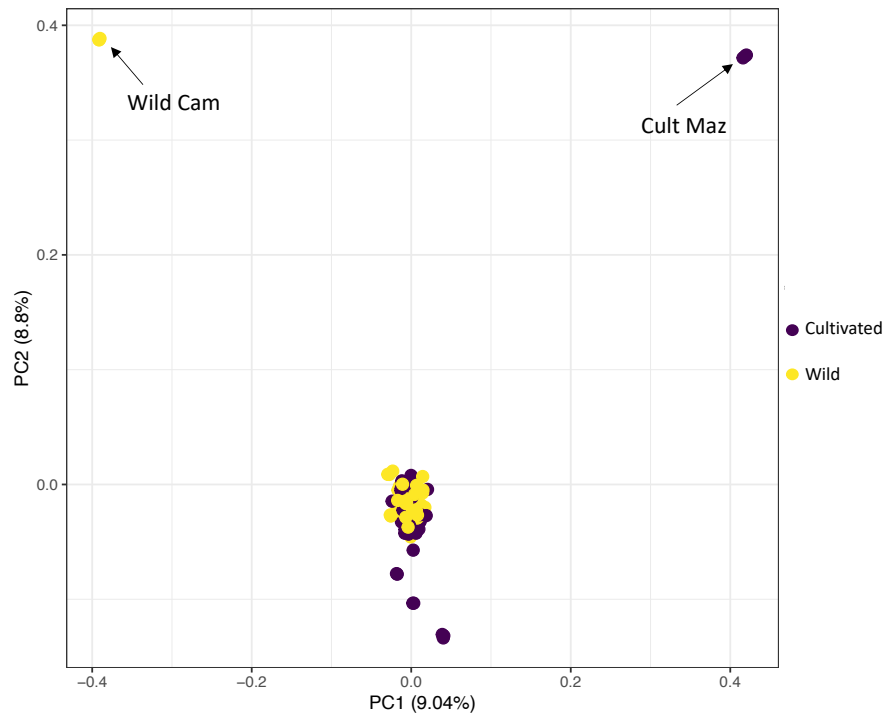

**Figure S4.** Relationships among *Agave angustifolia* var. *pacifica* individuals from the state of Sonora, Mexico, wild and cultivated samples as represented by principal component analysis (PCA) using 11,619 genome-wide SNPs. All 95 samples were included.



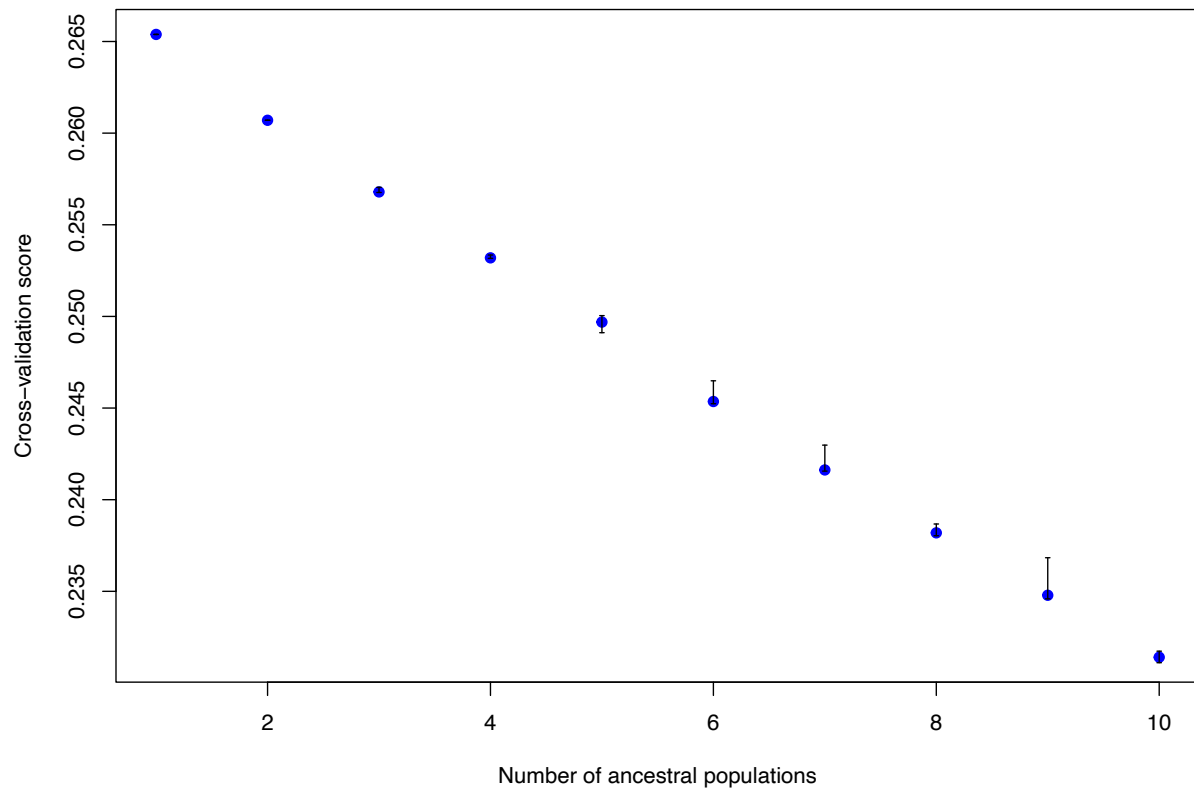

**Figure S5.** Plot of TESS3 cross validation error from  $K = 1$  through  $K = 10$ , based only on wild samples. Twenty runs were performed for each value of  $K$ .

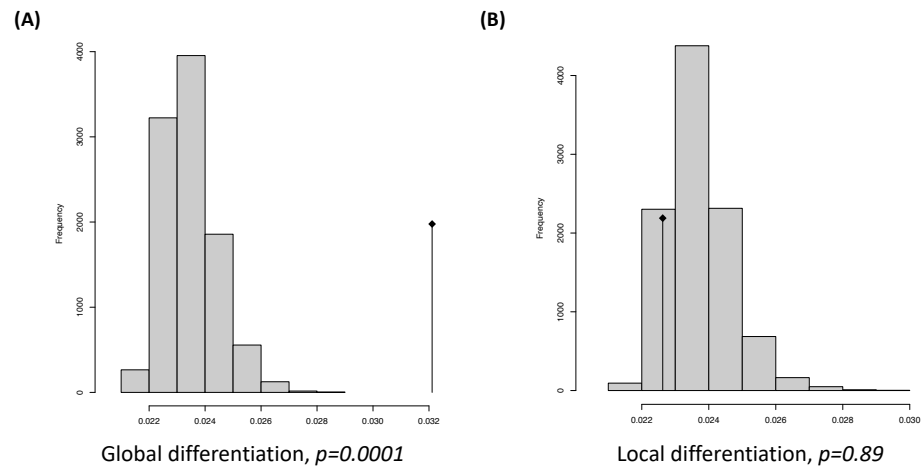

**Figure S6.** Results of eigen value test for sPCA analysis. The (A) global differentiation is significant when compared to the (B) local differentiation. The figure was generated using the R package *ade4*.

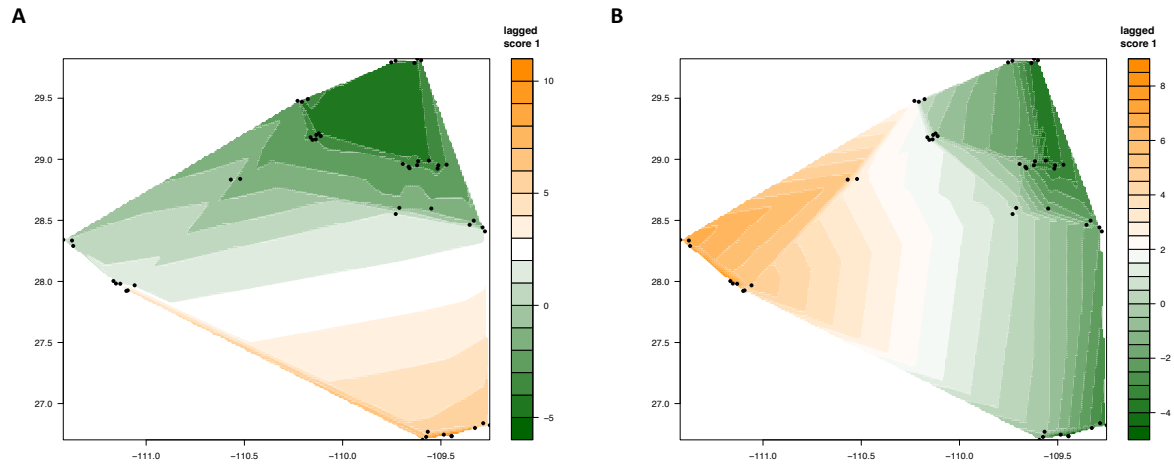

**Figure S7.** Results of the spatial PCA analysis; lagged scores are plotted as a cline map, panel (A) representing the first axis and (B) representing the second axis. Black dots correspond to sampling sites.

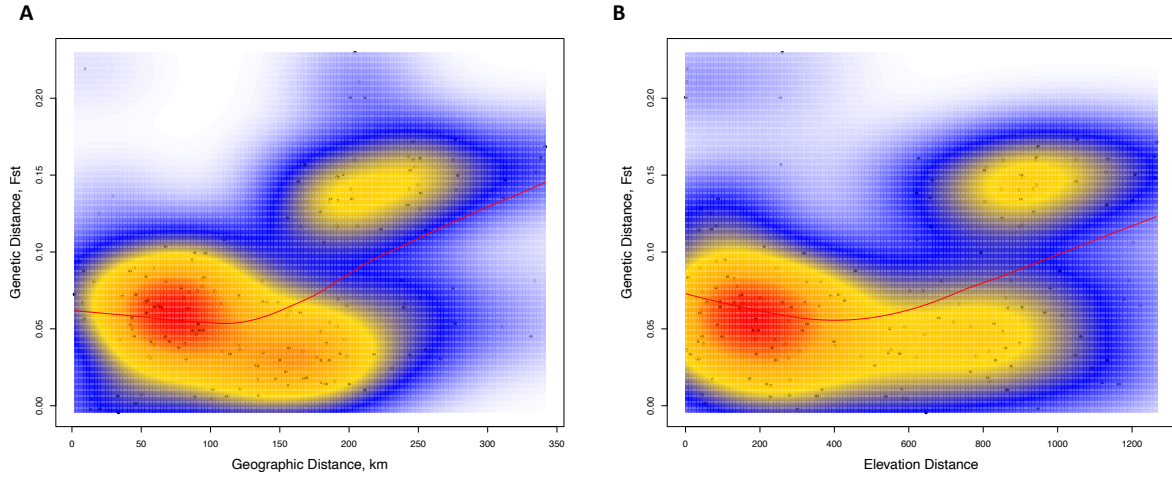

**Figure S8.** Results of the (A) isolation by distance and (B) isolation by elevation plots illustrating the relationships between genetic differentiation among sites of wild *Agave angustifolia* var. *pacifica* from the state of Sonora, Mexico, and (A) geographic distance ( $r = 0.41$ ,  $p = 0.007$ ) and (B) isolation by elevation ( $r = 0.19$ ,  $p = 0.01$ ), using a two-dimensional kernel density estimation as implemented in the *MASS* package in R.

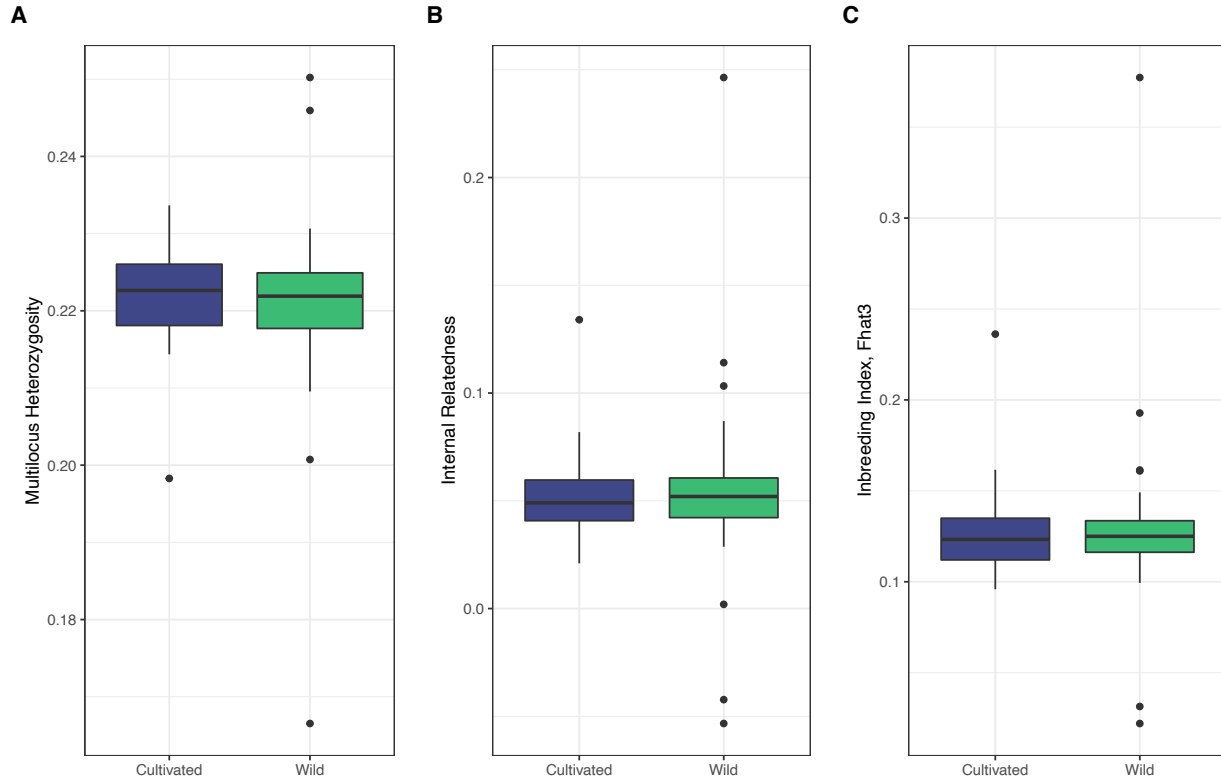

**Figure S9.** Boxplots of the individual based diversity estimates and inbreeding index for wild (green) and cultivated (blue) samples of *Agave angustifolia* var. *pacifica* from the state of Sonora, Mexico. No significant differences were found.

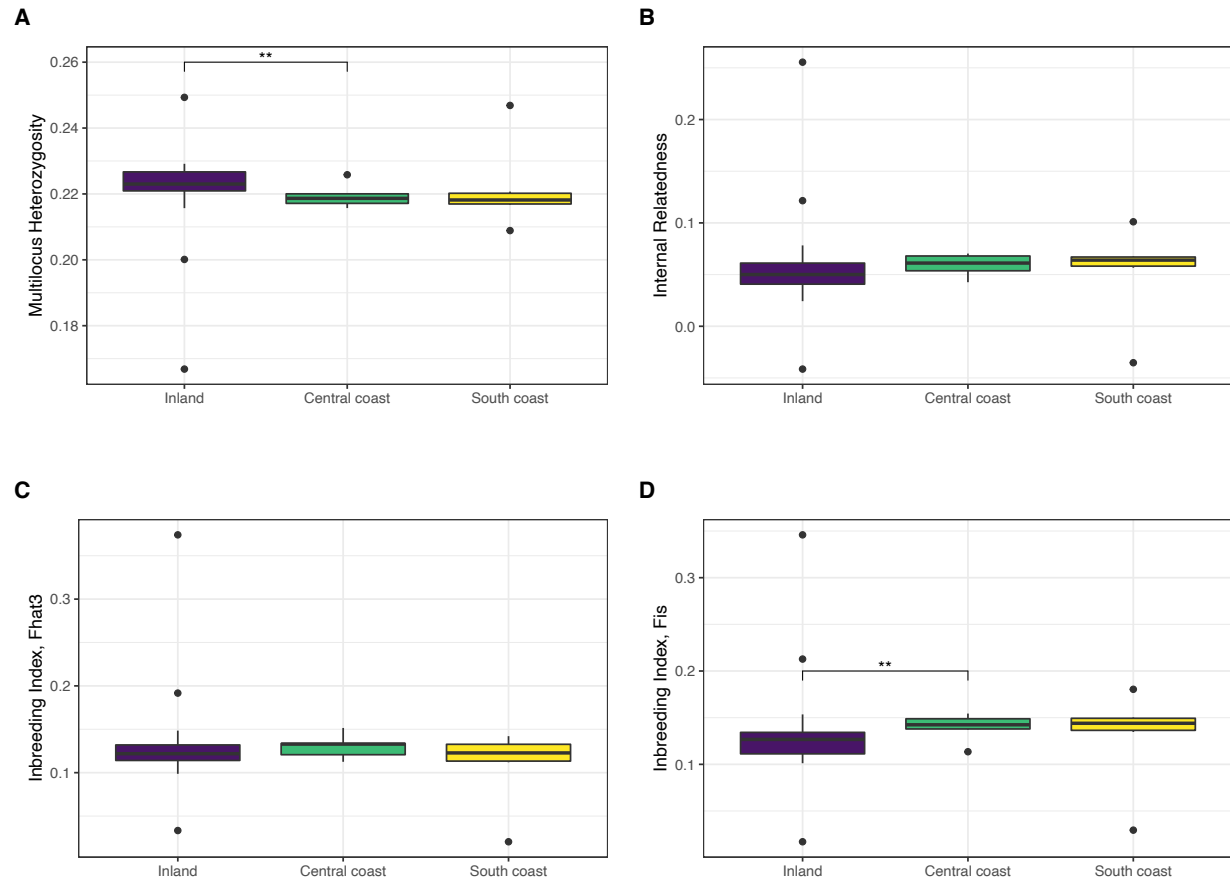

**Figure S10.** Boxplots of the individual based diversity estimates and inbreeding index for wild *Agave angustifolia* var. *pacifica* from the state of Sonora, Mexico populations identified with spatial analysis. Significant differences between groups (after FDR correction) are represented by horizontal black line connecting groups that were significantly different, with asterisks corresponding to the significance level (\* < 0.05, \*\* < 0.001 and \*\*\* < 0.0001).

## Detailed DNA extraction protocol.

### CTAB buffer:

- CTAB buffer 2% CTAB X (hexadecyltrimethylammonium bromide)
- 100 mM TrisHCl [pH=8]
- 20 mM EDTA
- 0.2%  $\beta$ -mercaptoethanol (added just before use)

### Steps:

1. Grind the tissue with liquid nitrogen (from 0.1g to 1g) and add 600  $\mu$ L of CTAB2X. Transfer to a 1.5 ml microtube.
2. Spin at 10 000 rpm for 8 min at 4°C.
3. Discard the aqueous phase and resuspend with 600  $\mu$ L of CTAB2X buffer. Add 5  $\mu$ L of RNase (10mg/ml).
4. Incubate at 65°C for 15 min. Mix by inverting the microtube from time to time. Afterwards keep in ice for 10-15 min.
5. Add 600  $\mu$ L of chloroform:octanol (24:1) solution - work in the fume hood. Gently mix by inverting the microtube.
6. Spin at 13 000 rpm for 15 min at 4°C.
7. Carefully transfer the aqueous phase (above the white interface layer) to a clean microtube (then discard the rest).
8. Add 2.5X the volume of absolute ethanol and 1/10 the volume of cold sodium acetate. Incubate overnight at 4°C.
9. Spin 13000 rpm for 10 min at 4°C and discard the supernatant.
10. Add 1 ml of cold 70% EtOH and spin at 13000 rpm for 10 min at 4°C. Repeat this step once or twice to wash the pellet.
11. Remove the supernatant and dry the pellet by leaving tube open at room temperature.
12. Resuspend the pellet in 100-200 sterile water 100-200ul
